# Supplementary material for: Soybean transcription factor ORFeome associated with drought resistance: a valuable resource to accelerate research on abiotic stress resistance
Source: PubMed Central journal article supplement (PMC4534118; doi:10.1186/s12864-015-1743-6), 2015-08-13

## Additional file 5 Integration of TF ORFeome information into Soykb

On the TF-ORFeome data page in SoyKB (A), clicking a gene of interest will lead you into the gene card page of this gene (B), where you can browse the relevant genomic information (C) and multi-omics expression datasets (D, E).

A

TF-ORFeome-Drought Clone and Primer Information

Download

|            |               |                 |      |                                                           |
|------------|---------------|-----------------|------|-----------------------------------------------------------|
| HN_CCL_105 | Glyma02g14880 | Glyma02g14880.3 | BZIP | ATGAACCTCAGGAACCTTGGTGTGGAGATAACCACCCCACTTGGGATGCCATGCATC |
| HN_CCL_137 | Glyma03g37790 | Glyma03g37790.2 | BZIP | ATGGCATCACCGATCCAACAACAACGCTCGACTACTACAAGTTCTGGATCTGAAG   |
| HN_CCL_129 | Glyma05g28960 | Glyma05g28960.1 | BZIP | ATGGCTTCTCCTGGTGAAGTGAACCTATTCACTGGTTCAGTCTCTTCAAACCT     |
| HN_CCL_125 | Glyma06g01240 | Glyma06g01240.1 | BZIP | ATGACTATGGCTTGTCAAGTGAACATCTTCAGGGACGTCGCGGAGCTGCAGGGT    |
| HN_CCL_138 | Glyma08g12170 | Glyma08g12170.1 | BZIP | ATGGCTTCTCCTGGTGAAGTGGACCTATTCACTGGTTCAGTCTCTCAAACCT      |
| HN_CCL_142 | Glyma08g28220 | Glyma08g28220.1 | BZIP | ATGCAGGCCAGGGAGATCACAGGACTCAATTTACTCCCTCAGACCTTGTTC       |
| HN_CCL_130 | Glyma11g12240 | Glyma11g12240.1 | BZIP | ATGGCTTGTCAAGTGAACATCTTCAGGGTCATTATCTCTGCTTCAGAACCTGGTT   |
| HN_CCL_128 | Glyma12g04440 | Glyma12g04440.1 | BZIP | ATGGCTTCTCAAGTGAACATCTTCAGGGTCATCTGCTTCAGAACCTGGTCTCTC    |
| HN_CCL_141 | Glyma16g03190 | Glyma16g03190.1 | BZIP | ATGGAAACAGTGAGGAAGAGAAATCTGTTAAACTGGAAGTCTTCTTCCACCTC     |
| HN_CCL_140 | Glyma17g17100 | Glyma17g17100.1 | BZIP | ATGCTTTCTCCCTCCCTCCGACCCCTTCTCACCTTCTCCGCGGGCTCACGCCGT    |

TF-ORFeome-Drought Motif Prediction

TF-ORFeome-Drought Motif Site Summary

B

Home Search Browse Tools Data Files Information Help About

# SOYBEAN KNOWLEDGE BASE (SoyKB)

A web resource for Soybean Translational Genomics

Quick Search  Gene Card

**GeneID (GlymaID)**  **Gene Mapping Name (G.max Wm82.a2.v1)**

**Gene Version**

Gene Model V1.0 ➔ Assembly V1.1

Deleted Gene in Latest Gene Model Version 9.0

**Gene Family Name**

BZIP Transcription factor

**Alternative Spliced Gene Models**

Glyma02g14880.1 ➔ Glyma02g14880.2 ➔ Glyma02g14880.3

**Gene Model Draft**

C

### Chromosomal Information

| Gene         | Chromosome | Start    | End      | Strand | PACID    | LetterCode* | Note                | GenomeBrowser        |
|--------------|------------|----------|----------|--------|----------|-------------|---------------------|----------------------|
| mRNA         | Gm02       | 13385858 | 13388487 | -      | 16248100 | E           | protein_coding_gene | <a href="#">View</a> |
| <b>Exons</b> |            |          |          |        |          |             |                     |                      |
| CDS          | Gm02       | 13387345 | 13388487 | -      | 16248100 | E           | protein_coding_gene |                      |
| CDS          | Gm02       | 13386434 | 13386905 | -      | 16248100 | E           | protein_coding_gene |                      |
| CDS          | Gm02       | 13386304 | 13386333 | -      | 16248100 | E           | protein_coding_gene |                      |
| CDS          | Gm02       | 13386132 | 13386206 | -      | 16248100 | E           | protein_coding_gene |                      |
| <b>UTRs</b>  |            |          |          |        |          |             |                     |                      |
| 3'-UTR       | Gm02       | 13385858 | 13386131 | -      | 16248100 | E           | protein_coding_gene |                      |

\*refer to : <http://www.phytozome.net/soybean.php>  
E EST consistent

### QTL Traits

| Traits                     | Chromosome | Start    | End      |
|----------------------------|------------|----------|----------|
| FUNGAL                     | GM02       | 11820000 | 14972000 |
| IRRIGATED YIELD NGUYEN LAB | GM02       | 11465400 | 23777900 |
| LEAF-STEM                  | GM02       | 1773000  | 22655000 |
| ROOT DRY WEIGHT NGUYEN LAB | GM02       | 11465400 | 23777900 |

### SNP

#### GWAS

| Chromosome | Position | Ref | W01 | W02 | W03 | W04 | W05 | W06 | W07 | W08 | W09 | W10 | W11 | W12 | W13 | W14 | W15 |
|------------|----------|-----|-----|-----|-----|-----|-----|-----|-----|-----|-----|-----|-----|-----|-----|-----|-----|
| Gm02       | 13386705 | T   | T   | T   | T   | T   | T   | C   | C   | C   | T   | Y   | T   | T   | T   | T   | T   |
| Gm02       | 13386995 | T   | T   | T   | T   | T   | T   | C   | C   | C   | T   | Y   | T   | T   | T   | T   | T   |
| Gm02       | 13387071 | C   | C   | Y   | C   | C   | C   | T   | -   | -   | C   | -   | C   | C   | T   | -   | T   |
| Gm02       | 13387211 | G   | G   | G   | G   | G   | G   | G   | G   | G   | G   | G   | G   | G   | S   | C   | G   |
| Gm02       | 13387336 | A   | A   | R   | A   | A   | A   | G   | G   | G   | A   | R   | A   | A   | R   | R   | G   |
| Gm02       | 13388030 | T   | A   | A   | T   | T   | T   | -   | A   | A   | T   | W   | T   | T   | W   | W   | A   |
| Gm02       | 13388464 | A   | A   | M   | A   | A   | A   | C   | C   | C   | -   | C   | A   | A   | A   | A   | C   |

D

### Fast Neutron Mutant Data

(special license needed to access the data)

#### Sequence Evidence

EST - No data available for this gene ID

5' RATE - No data available for this gene ID

Full Length cDNA - No data available for this gene ID

#### Epigenomics Evidence

Methylation Data - No data available in this gene.

#### Proteomics Evidence

Proteomics[B.japonicum Inoculation] - No data available in this gene.

Proteomics[Heat Stress] - No data available in this gene.

Proteomics [Public Data] - No data available in this gene.

#### Transcriptomics Evidence

##### Rna-seq(Solexa/Illumina)

Transcriptomics [Solexa/Illumina\_RPKM]

Transcriptomics [Solexa/Illumina\_ReadCount] (special license needed to access the data)

##### Microarray

Transcriptomics [Microarray - Leaf and Root] (special license needed to access the data)

Transcriptomics [Microarray - Tissue]

Transcriptomics [Microarray - Stress]

Transcriptomics [Steve-Affy] (special license needed to access the data)

Transcriptomics[Melissa] - No data available for this gene ID

##### Oligo

Transcriptomics[Oligo] - No data available for this gene ID

##### CDNA

Transcriptomics[CDNA] - No data available for this gene ID

##### Rna-seq (Trinity)

Transcriptomics[Steve-CD215] - No data available for this gene ID

Transcriptomics[Steve-IAC100] - No data available for this gene ID

E

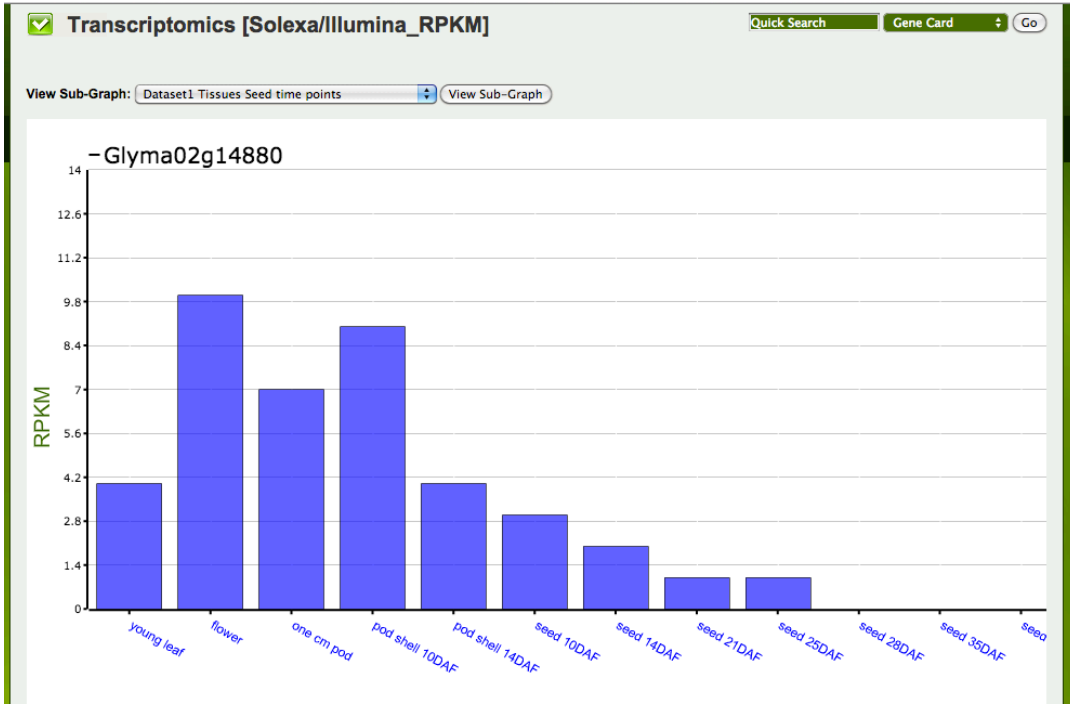

Supplement: 12864_2015_1743_MOESM5_ESM.pdf [file 12864_2015_1743_MOESM5_ESM.pdf]
